# Supplementary material for: Charge-Discharge Characteristics of Textile Energy Storage Devices Having Different PEDOT:PSS Ratios and Conductive Yarns Configuration
Source: PubMed Central journal article supplement (PMC6419215; doi:10.3390/polym11020345), 2019-02-16
Supplement: polymers-11-00345-s001.pdf [file polymers-11-00345-s001.pdf]

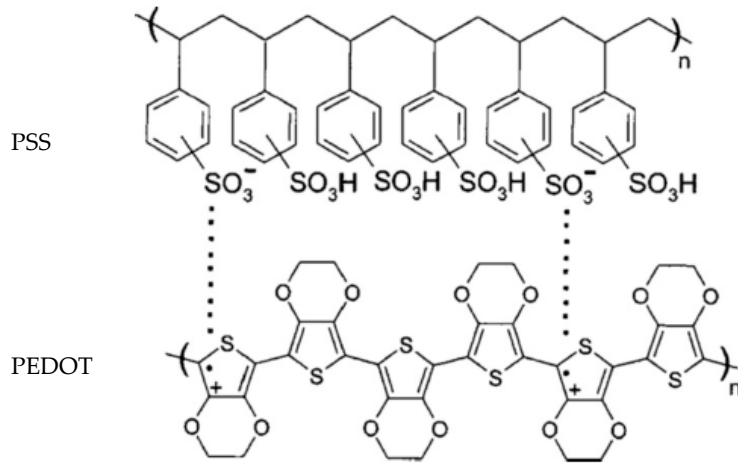

**Supplementary Figure 1:** Chemical structure of PEDOT:PSS [19]

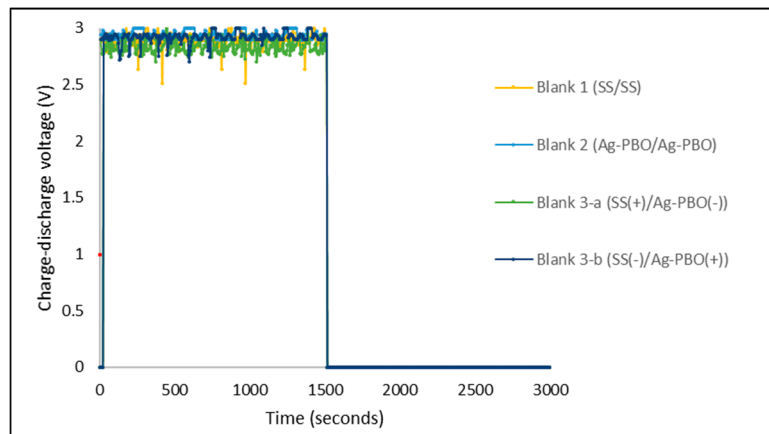

**Supplementary Figure 2:** Charge-discharge characteristics of blank devices (without PEDOT:PSS) using various electrodes (SS/SS, Ag-PBO/Ag-PBO, SS(+)/Ag-PBO(-), and SS(-)/Ag-PBO(+)), each charged at 3 volt.
